# Supplementary material for: Effects of Mobile Application Program (App)-Assisted Health Education on Preventive Behaviors and Cancer Literacy among Women with Cervical Intraepithelial Neoplasia
Source: MDPI journal article supplement (doi:10.3390/ijerph182111603), 2021-11-04
Supplement: s1 [file s1]

**(A) Practice of Health behavior**

Note. During the past 4 weeks, how MUCH health behavior that you have done in your impression?

|                                                                                                                                                                                                                                     | 0 never                  | 1 sometimes              | 2 often                  | 3 always                 |
|-------------------------------------------------------------------------------------------------------------------------------------------------------------------------------------------------------------------------------------|--------------------------|--------------------------|--------------------------|--------------------------|
| ● <b>Never(0)</b> : Never been done, less than 10% do it (0-10%)                                                                                                                                                                    |                          |                          |                          |                          |
| ● <b>Sometimes(1)</b> : Sometimes been done, about 30% to 50% do it ( 11-50%) ◦                                                                                                                                                     |                          |                          |                          |                          |
| ● <b>Often(2)</b> : Most of the time, about 70% or more do it. (51-70%) ◦                                                                                                                                                           |                          |                          |                          |                          |
| ● <b>Always(3)</b> : Almost do it, about 80% to 90% or more do it, (71-100%) ◦                                                                                                                                                      |                          |                          |                          |                          |
| 1. Control Bodyweight to avoid mild obesity (BMI > 27 )                                                                                                                                                                             | <input type="checkbox"/> | <input type="checkbox"/> | <input type="checkbox"/> | <input type="checkbox"/> |
| 2. Choose a diet with low fat, saturated fatty acids and cholesterol (e.g. Eat less whole milk, red meat, fried food, potato chips or fried food, fast food, fatty meat, chicken skin, and less lard oil and butter to cooking)     | <input type="checkbox"/> | <input type="checkbox"/> | <input type="checkbox"/> | <input type="checkbox"/> |
| 3. Choose a diet with less processed meat (less bacon, sausage, ham, bacon, jerky, etc.)                                                                                                                                            | <input type="checkbox"/> | <input type="checkbox"/> | <input type="checkbox"/> | <input type="checkbox"/> |
| 4. Eat 3-5 servings of fruits and vegetables a day                                                                                                                                                                                  | <input type="checkbox"/> | <input type="checkbox"/> | <input type="checkbox"/> | <input type="checkbox"/> |
| ● 1 serving : 1/2 bowl cooked vegetables, 1 bowl lettuce, 1 orange, 1/3 guavas, 1/4 grapefruit, 1/4 papaya, 2 lotus mist, 1 star fruit                                                                                              |                          |                          |                          |                          |
| 5. Get at least 150 minutes of moderate aerobic activity (brisk walking, climbing, car washing, mopping, fitness exercises, etc.) or 75 minutes of vigorous aerobic activity (running, climbing stairs, playing ball, etc.) a week. | <input type="checkbox"/> | <input type="checkbox"/> | <input type="checkbox"/> | <input type="checkbox"/> |
| 6. Drink less than 2 servings a day (1 serving: 1 can of beer, 1 goblet of red wine or mixed wine, 1 cup of 50cc whiskey)                                                                                                           | <input type="checkbox"/> | <input type="checkbox"/> | <input type="checkbox"/> | <input type="checkbox"/> |
|                                                                                                                                                 |                          |                          |                          |                          |
| 7. Smoking every day                                                                                                                                                                                                                | <input type="checkbox"/> | <input type="checkbox"/> | <input type="checkbox"/> | <input type="checkbox"/> |
| 8. Smoking second-hand smoke every day                                                                                                                                                                                              | <input type="checkbox"/> | <input type="checkbox"/> | <input type="checkbox"/> | <input type="checkbox"/> |
| 9. Regular Pap smears (once every 3 years after first time intercourse during 20-30 y/o , or once a year ≥30 y/o)                                                                                                                   | <input type="checkbox"/> | <input type="checkbox"/> | <input type="checkbox"/> | <input type="checkbox"/> |
| 10. Regular breast screening (breast self-examination after menstruation, or mammography every 2 years ≥45 y/o)                                                                                                                     | <input type="checkbox"/> | <input type="checkbox"/> | <input type="checkbox"/> | <input type="checkbox"/> |
| 11. Regular oral cancer screening (oral mucosal examination once every 2 years)                                                                                                                                                     | <input type="checkbox"/> | <input type="checkbox"/> | <input type="checkbox"/> | <input type="checkbox"/> |
| 12. Regular colorectal cancer screening (fecal occult blood test once every 2 years)                                                                                                                                                | <input type="checkbox"/> | <input type="checkbox"/> | <input type="checkbox"/> | <input type="checkbox"/> |
| 13. Adopt safe sex behavior (abstinence, single sex partner, use condom)                                                                                                                                                            | <input type="checkbox"/> | <input type="checkbox"/> | <input type="checkbox"/> | <input type="checkbox"/> |
| 14. Use oral contraceptives                                                                                                                                                                                                         | <input type="checkbox"/> | <input type="checkbox"/> | <input type="checkbox"/> | <input type="checkbox"/> |

**(B) Plan and Reason to change Health behavior**

Note: During the past 4 weeks, how MUCH plan of health behavior that you have done in your impression?

15. How MUCH plan of health behavior change that you have done?

| <b>No need to change (0):</b> No idea of changing health behaviors at all.<br><b>Consider to change (1):</b> There is an idea to change healthy behavior, but it hasn't started yet.<br><b>Occasional changes (2):</b> I will change my health behavior when I think about it, but there is no regularity.<br><b>Has changed (3):</b> My health behavior has been changed, but the change has not been more than six months.<br><b>Maintain the change(4):</b> I have changed my health behavior and it has changed for more than six months<br><b>Complete the change(5):</b> I am absolutely sure that will not return to the state of healthy behavior before the change | 0<br>No need to change | 1<br>Consider to change | 2<br>Occasional changes | 3<br>Has changed | 4<br>Maintain the change | 5<br>Complete the change |
|-----------------------------------------------------------------------------------------------------------------------------------------------------------------------------------------------------------------------------------------------------------------------------------------------------------------------------------------------------------------------------------------------------------------------------------------------------------------------------------------------------------------------------------------------------------------------------------------------------------------------------------------------------------------------------|------------------------|-------------------------|-------------------------|------------------|--------------------------|--------------------------|
| (e.g.) Plan of running                                                                                                                                                                                                                                                                                                                                                                                                                                                                                                                                                                                                                                                      |                        |                         | √                       |                  |                          |                          |
| 1. Body weight control                                                                                                                                                                                                                                                                                                                                                                                                                                                                                                                                                                                                                                                      |                        |                         |                         |                  |                          |                          |
| 2. Fat intake                                                                                                                                                                                                                                                                                                                                                                                                                                                                                                                                                                                                                                                               |                        |                         |                         |                  |                          |                          |
| 3. Processed meat intake (bacon, sausage, ham, bacon, jerky, etc.)                                                                                                                                                                                                                                                                                                                                                                                                                                                                                                                                                                                                          |                        |                         |                         |                  |                          |                          |
| 4. fruits and vegetables intake                                                                                                                                                                                                                                                                                                                                                                                                                                                                                                                                                                                                                                             |                        |                         |                         |                  |                          |                          |
| 5. Physical activity or exercise                                                                                                                                                                                                                                                                                                                                                                                                                                                                                                                                                                                                                                            |                        |                         |                         |                  |                          |                          |
| 6. Alcohol intake                                                                                                                                                                                                                                                                                                                                                                                                                                                                                                                                                                                                                                                           |                        |                         |                         |                  |                          |                          |
| 7. Smoking                                                                                                                                                                                                                                                                                                                                                                                                                                                                                                                                                                                                                                                                  |                        |                         |                         |                  |                          |                          |
| 8. Reject second-hand smoke                                                                                                                                                                                                                                                                                                                                                                                                                                                                                                                                                                                                                                                 |                        |                         |                         |                  |                          |                          |
| 9. Pap smear                                                                                                                                                                                                                                                                                                                                                                                                                                                                                                                                                                                                                                                                |                        |                         |                         |                  |                          |                          |
| 10. Breast Screening                                                                                                                                                                                                                                                                                                                                                                                                                                                                                                                                                                                                                                                        |                        |                         |                         |                  |                          |                          |
| 11. Oral cancer screening                                                                                                                                                                                                                                                                                                                                                                                                                                                                                                                                                                                                                                                   |                        |                         |                         |                  |                          |                          |
| 12. Colorectal cancer screening                                                                                                                                                                                                                                                                                                                                                                                                                                                                                                                                                                                                                                             |                        |                         |                         |                  |                          |                          |
| 13. Safe sex behavior                                                                                                                                                                                                                                                                                                                                                                                                                                                                                                                                                                                                                                                       |                        |                         |                         |                  |                          |                          |
| 14. Receive HPV vaccine                                                                                                                                                                                                                                                                                                                                                                                                                                                                                                                                                                                                                                                     |                        |                         |                         |                  |                          |                          |
| 15. Oral contraceptives used                                                                                                                                                                                                                                                                                                                                                                                                                                                                                                                                                                                                                                                |                        |                         |                         |                  |                          |                          |
| 16. Other(please Specify)<br>_____                                                                                                                                                                                                                                                                                                                                                                                                                                                                                                                                                                                                                                          |                        |                         |                         |                  |                          |                          |

16. The following reasons to consider changing healthy behaviors, which are meaningful to you?

|                                                                                                        | Very important | Somewhat important | Neutral | Not much important | Not at all important |
|--------------------------------------------------------------------------------------------------------|----------------|--------------------|---------|--------------------|----------------------|
| 1. Practice healthy behaviors makes me healthier                                                       |                |                    |         |                    |                      |
| 2. Taking responsibility for my health makes me more confident                                         |                |                    |         |                    |                      |
| 3. I can eat healthier and more nutritious                                                             |                |                    |         |                    |                      |
| 4. Weight control can make me healthier                                                                |                |                    |         |                    |                      |
| 5. Eating less high-fat foods can make me healthier                                                    |                |                    |         |                    |                      |
| 6. Eating less processed meat can make me healthier                                                    |                |                    |         |                    |                      |
| 7. Eat more fruits and vegetables can make me healthier                                                |                |                    |         |                    |                      |
| 8. At least 150 minutes of moderate or 75 minutes of strenuous activity per week can make me healthier |                |                    |         |                    |                      |
| 9. Controlling the amount of smoking can make me healthier                                             |                |                    |         |                    |                      |
| 10. Refusing to smoke secondhand smoke can make me healthier                                           |                |                    |         |                    |                      |
| 11. Controlling alcohol intake can make me healthier                                                   |                |                    |         |                    |                      |
| 12. Cancer screening can protect me                                                                    |                |                    |         |                    |                      |
| 13. HPV vaccine can protect me                                                                         |                |                    |         |                    |                      |
| 14. Pap smears are important for women                                                                 |                |                    |         |                    |                      |
| 15. Doing a Pap smear can detect and treat cervical cancer early                                       |                |                    |         |                    |                      |
| 16. Other(please Specify) _____                                                                        |                |                    |         |                    |                      |

17. The following reasons for not changing healthy behaviors, which are meaningful to you?

|                                                                                                      | Very important | Somewhat important | Neutral | Not much important | Not at all important |
|------------------------------------------------------------------------------------------------------|----------------|--------------------|---------|--------------------|----------------------|
| 1. No time due to work or household duties                                                           |                |                    |         |                    |                      |
| 2. I am healthy, so I don't need to change.                                                          |                |                    |         |                    |                      |
| 3. I'm embarrassed and afraid that others will say what I do.                                        |                |                    |         |                    |                      |
| 4. Controlling weight is difficult for me                                                            |                |                    |         |                    |                      |
| 5. It is difficult for me to eat less high-fat foods                                                 |                |                    |         |                    |                      |
| 6. It is difficult for me to eat less processed meat                                                 |                |                    |         |                    |                      |
| 7. It is difficult for me to eat more fruits and vegetables                                          |                |                    |         |                    |                      |
| 8. At least 150 minutes of moderate or 75 minutes of strenuous activity per week is difficult for me |                |                    |         |                    |                      |
| 9. 9. It is difficult for me to stop smoking                                                         |                |                    |         |                    |                      |
| 10. It is difficult for me to refuse secondhand smoke                                                |                |                    |         |                    |                      |
| 11. It is difficult for me to control the amount of drink                                            |                |                    |         |                    |                      |
| 12. Cancer screening is difficult for me                                                             |                |                    |         |                    |                      |
| 13. HPV vaccine is not safe                                                                          |                |                    |         |                    |                      |
| 14. HPV vaccine is too expensive                                                                     |                |                    |         |                    |                      |
| 15. I don't know where to get t HPV vaccine                                                          |                |                    |         |                    |                      |
| 16. The male doctor performing Pap smear makes me feel very embarrassed                              |                |                    |         |                    |                      |
| 17. Still looking for a doctor I can trust                                                           |                |                    |         |                    |                      |
| 18. I don't have transportation to visit a doctor                                                    |                |                    |         |                    |                      |
| 19. Time-consuming of visiting a doctor is too long for me                                           |                |                    |         |                    |                      |
| 20. It is inconvenient for me to get Pap smears                                                      |                |                    |         |                    |                      |
| 21. Worried about bad Pap smear results                                                              |                |                    |         |                    |                      |
| 22. Afraid need to do more invasive examinations (colposcopy, biopsy)                                |                |                    |         |                    |                      |
| 23. Other(please Specify)_____                                                                       |                |                    |         |                    |                      |

## (C)Self-efficacy of health behavior

This part is mainly to assess your ability to practice different healthy behaviors in your daily life. It has nothing to do with your actual practice of health behavior.

Completely unsure (0) of it (0%)

Little certainty (1) that it can be done (25%)

Half certainty (2) (50%)

Most of them (3) can do it (75%)

Can do (4) it (100%)

|                                                                                                                                                                                                                                                | completely unsure<br>0   | little certainty<br>25%  | half certainty<br>50 %   | most of them<br>75 %     | most of them<br>100      |
|------------------------------------------------------------------------------------------------------------------------------------------------------------------------------------------------------------------------------------------------|--------------------------|--------------------------|--------------------------|--------------------------|--------------------------|
| 1. I can do at least 150 minutes of moderate physical activity (brisk walking, climbing, car washing, mopping, fitness exercises, etc.) or 75 minutes of strenuous physical activity (running, climbing stairs, playing ball, etc.) every week | <input type="checkbox"/> |
| 2. I can eat less fatty foods                                                                                                                                                                                                                  | <input type="checkbox"/> |
| 3. I can eat less processed meat                                                                                                                                                                                                               | <input type="checkbox"/> |
| 4. I can eat more fruits and vegetables                                                                                                                                                                                                        | <input type="checkbox"/> |
| 5. I can count my ideal weight and avoid mild obesity (BMI <27 )                                                                                                                                                                               | <input type="checkbox"/> |
| 6. I can drink less than 2 servings a day (1 serving:1 can of beer, 1 goblet of red wine or mixed wine, 1 cup of 50cc whiskey)                                                                                                                 | <input type="checkbox"/> |
| 7. I can stop smoking every day.                                                                                                                                                                                                               | <input type="checkbox"/> |
| 8. I can protect myself from second-hand smoke                                                                                                                                                                                                 | <input type="checkbox"/> |
| 9. I can do the health examination on time by my own schedule                                                                                                                                                                                  | <input type="checkbox"/> |
| 10. I can get a Pap smear once a year                                                                                                                                                                                                          | <input type="checkbox"/> |

## (D) Cervical cancer literacy

This part is to understand your awareness of cervical cancer. Please answer according to the actual situation (Some of them are reverse questions, not all of them are correct)

|                                                                                                                                                                                      | 1 Right                  | 2 wrong                  | 3 unsure                 |
|--------------------------------------------------------------------------------------------------------------------------------------------------------------------------------------|--------------------------|--------------------------|--------------------------|
| 1. Cervical cancer is a preventable cancer                                                                                                                                           | <input type="checkbox"/> | <input type="checkbox"/> | <input type="checkbox"/> |
| 2. After menopause, it is not easy to get cervical cancer.                                                                                                                           | <input type="checkbox"/> | <input type="checkbox"/> | <input type="checkbox"/> |
| 3. Pap smear is a good way to screen for cervical cancer.                                                                                                                            | <input type="checkbox"/> | <input type="checkbox"/> | <input type="checkbox"/> |
| 4. If you have symptoms such as abnormal bleeding, vaginal discharge of odorous substances, uncomfortable sexual intercourse, etc., you can go to the hospital for a Pap smear test. | <input type="checkbox"/> | <input type="checkbox"/> | <input type="checkbox"/> |
| 5. Cryotherapy and partial cervical excision are the common treatments for cervical precancerous lesions.                                                                            | <input type="checkbox"/> | <input type="checkbox"/> | <input type="checkbox"/> |

6. It means that you have cervical cancer when the result is low-grade cervical lesions (CIN 1). ☐ ☐ ☐
7. It means that you have cervical cancer when the abnormal result of Pap smear and HPV is positive. ☐ ☐ ☐
8. When you get an abnormal Pap smears or precancerous lesions result, you can discussed with your doctors about the treatment type based on your age and fertility planning. ☐ ☐ ☐
9. My doctor' s advice is the best and professional. I only need to do is by his/her order. ☐ ☐ ☐
10. I can get more examination or treatment information from other medical professionals, the Internet, medical websites, health magazines, books, TV programs, etc., and discuss the best method with the doctor. ☐ ☐ ☐

(F) QLQ30+CX24

| During the <u>past 4 weeks</u> , how do you feel about yourself?                                                                                                                                                                                                                       | 1                        | 2                        | 3                        | 4                        | Coding Code              |
|----------------------------------------------------------------------------------------------------------------------------------------------------------------------------------------------------------------------------------------------------------------------------------------|--------------------------|--------------------------|--------------------------|--------------------------|--------------------------|
|                                                                                                                                                                                                                                                                                        | Not at all               | A little                 | Quite a bit              | Very much                |                          |
| 1. Have you feel physically less attractive?                                                                                                                                                                                                                                           | <input type="checkbox"/> |
| 2. Have you feel less feminine?                                                                                                                                                                                                                                                        | <input type="checkbox"/> |
| 3. Have you feel dissatisfied with your body?                                                                                                                                                                                                                                          | <input type="checkbox"/> |
| 4. Have you worried that sex would painful?                                                                                                                                                                                                                                            | <input type="checkbox"/> |
| 5. Have you been sexually activity?<br><input type="checkbox"/> 0.No<br><input type="checkbox"/> 1.Yes(Please answer question 6)                                                                                                                                                       |                          |                          |                          |                          |                          |
| 6. Have you feel sexual discomfort during sexual intercourse?<br><input type="checkbox"/> 0.No<br><input type="checkbox"/> 1.Yes <input type="checkbox"/> 2.vagina dry <input type="checkbox"/> 3.vagina short <input type="checkbox"/> 4.vagina tight <input type="checkbox"/> 5.pain |                          |                          |                          |                          |                          |

(G)DT emotion status

1. During the past week, answer and circle the emotion status based on your feeling e.g.

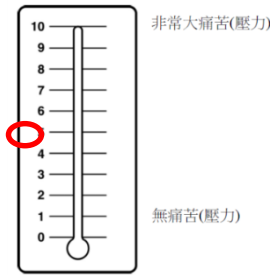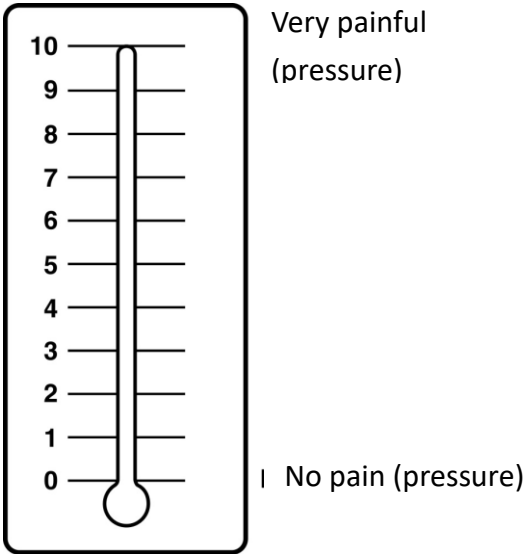

(H) Health status

1. Please draw a "dot" on the scale on the left to show your health status today.

100= Self-evaluate the best health status

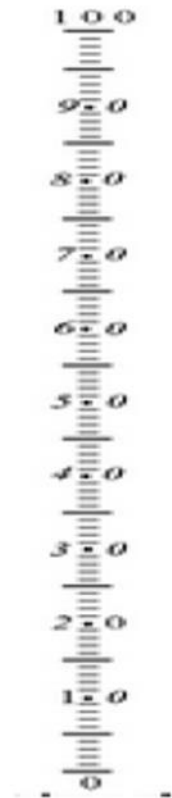

0= Self-evaluate the worst health status
